# Supplementary material for: Ejaculatory Abstinence Affects the Sperm Quality in Normozoospermic Men—How Does the Seminal Bacteriome Respond?
Source: MDPI journal article supplement (doi:10.3390/ijms24043503), 2023-02-09
Supplement: s1 [file s1]

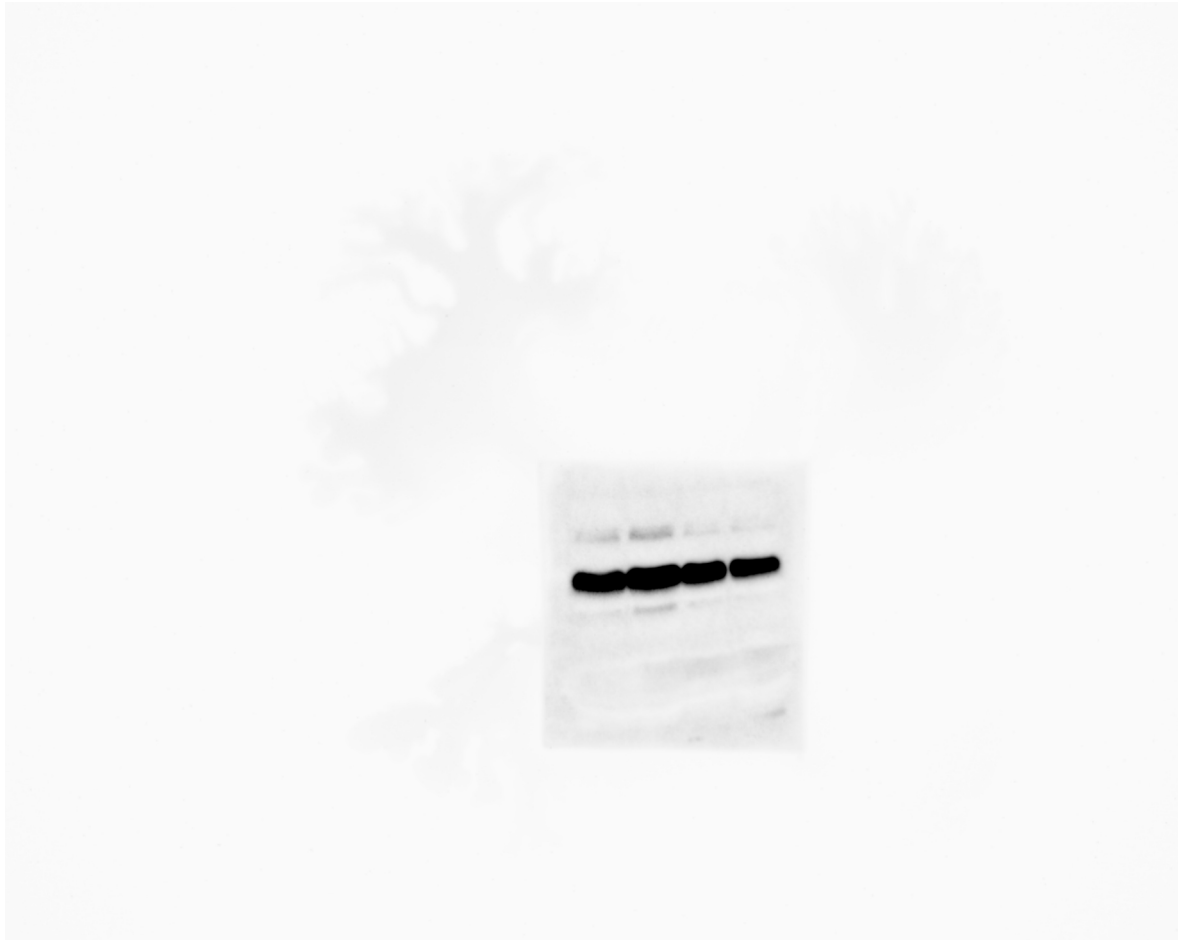

**Figure S1.** Original blot of BAX protein.

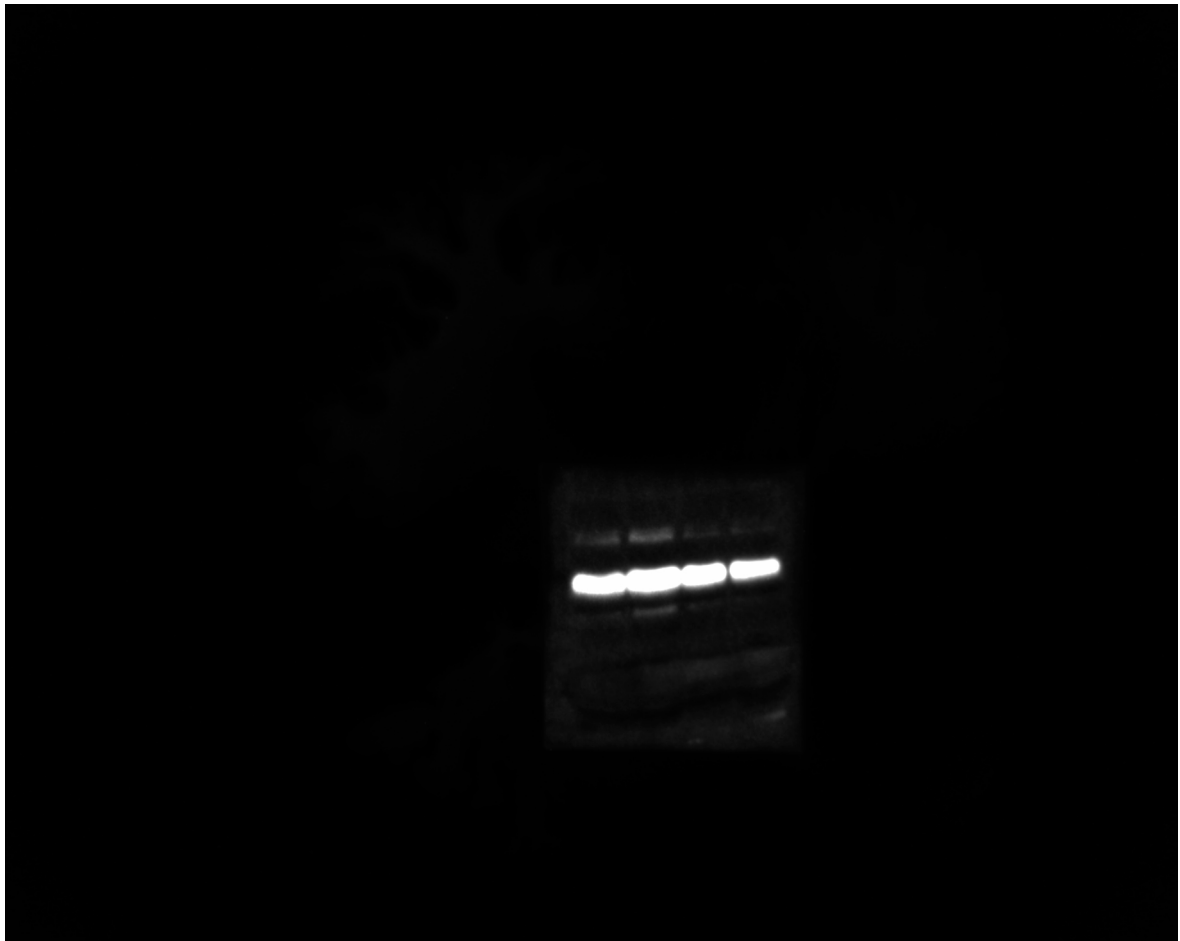

**Figure S2.** Inverted blot of BAX protein.

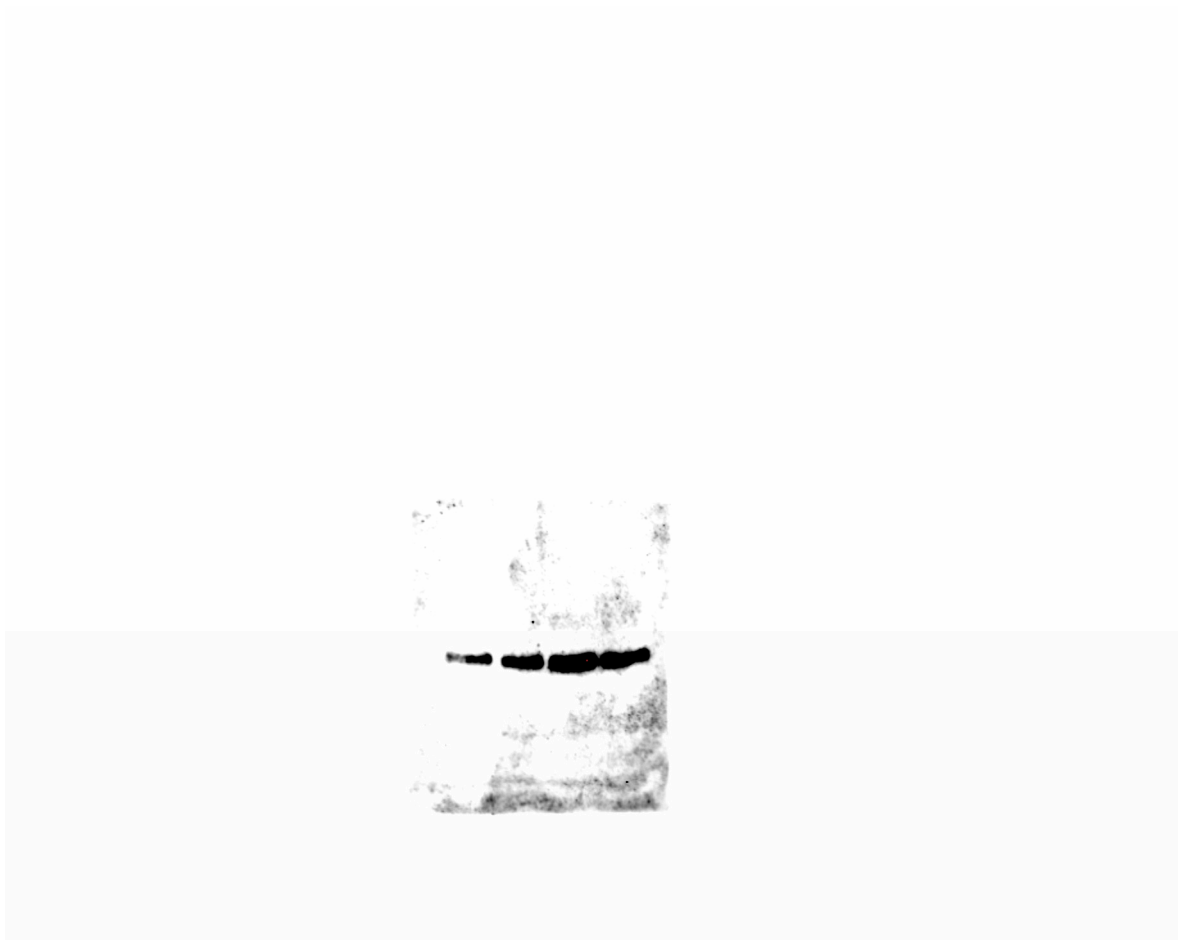

**Figure S3.** Original blot of Bcl-2 protein.

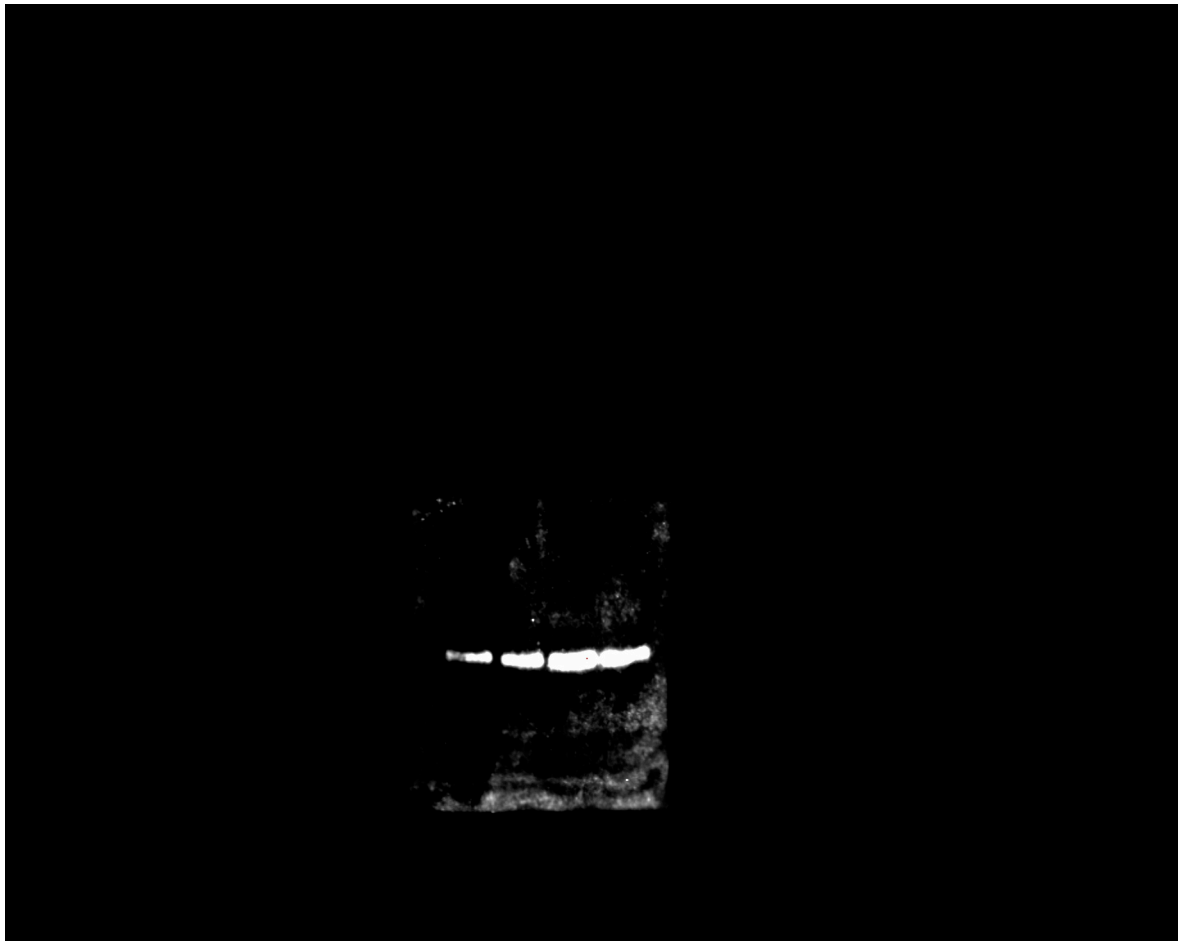

**Figure S4.** Inverted blot of Bcl-2 protein.

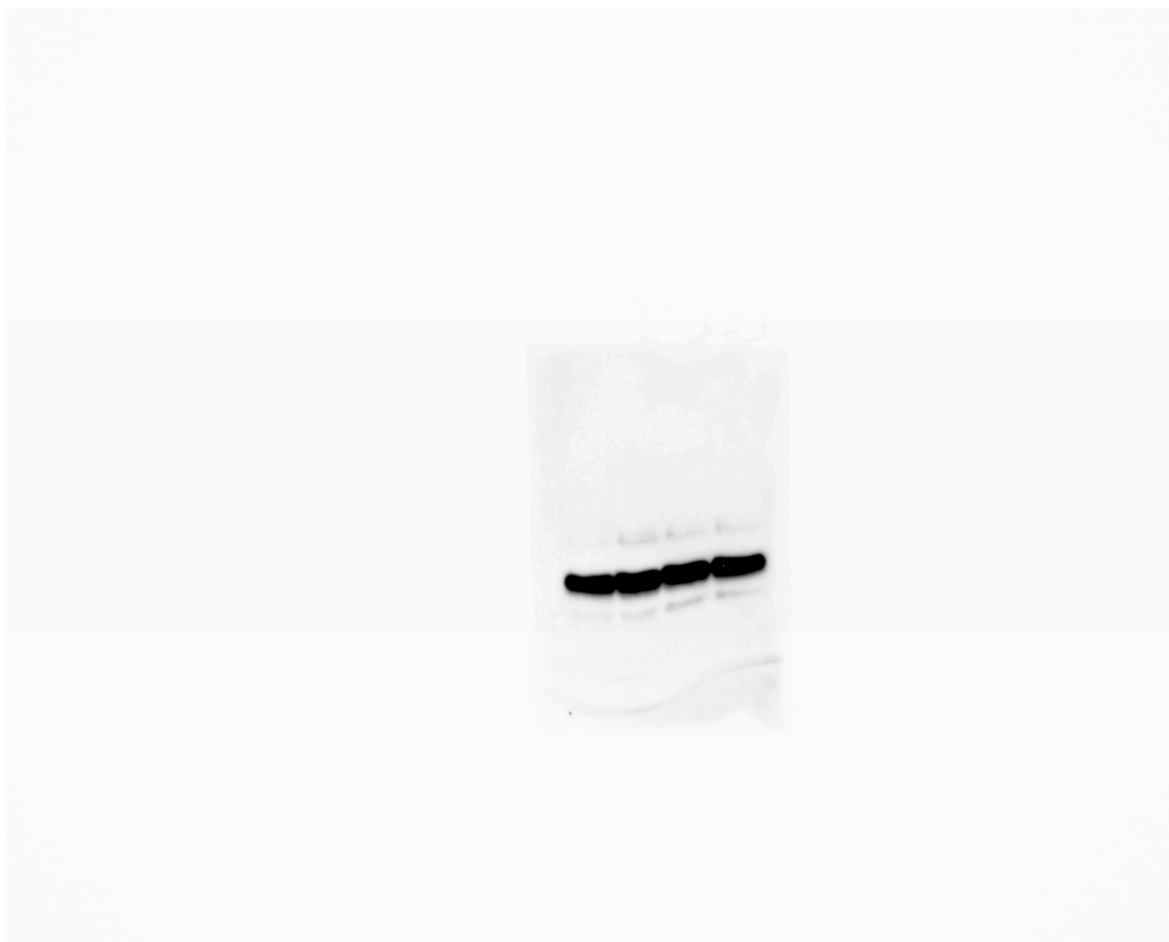

**Figure S5.** Original blot of beta actin.

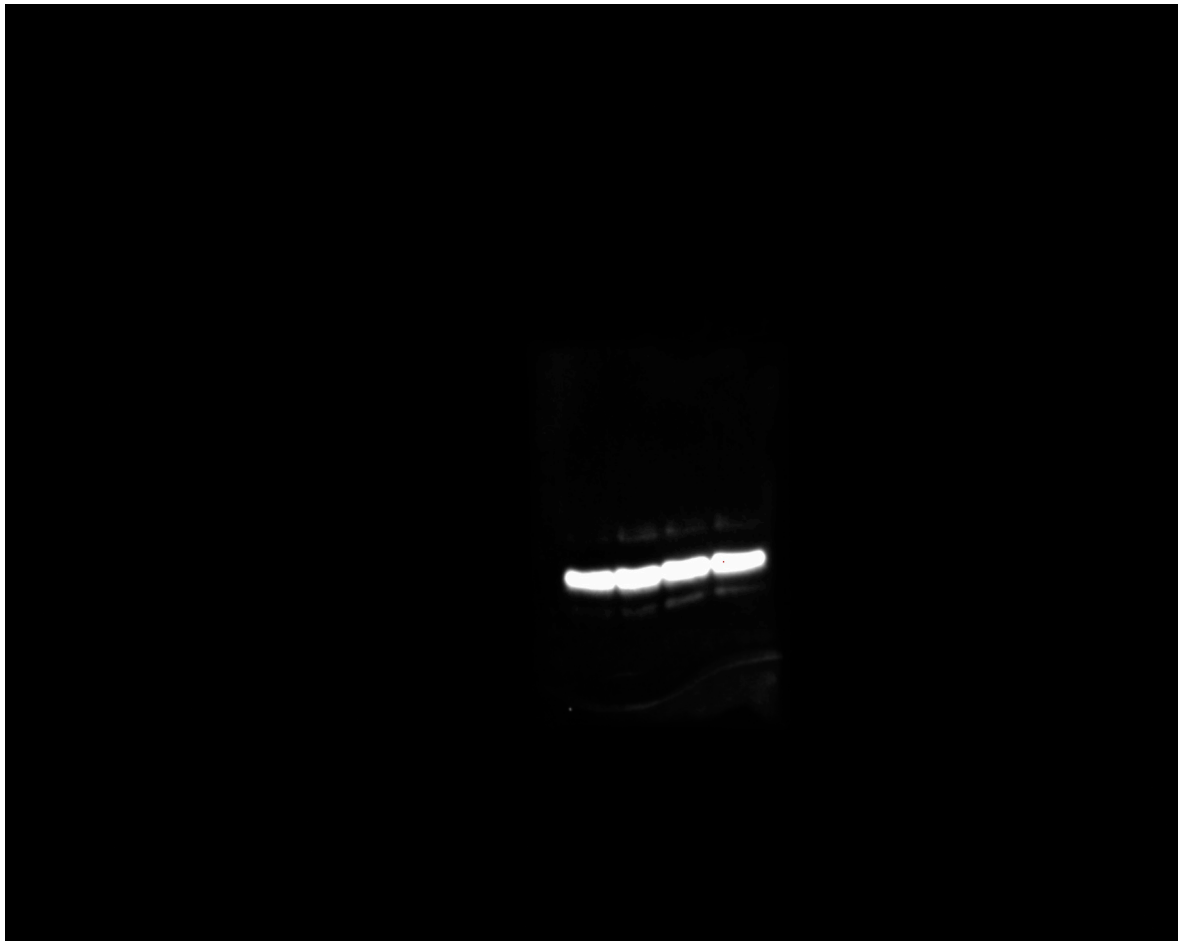

**Figure S6.** Inverted blot of beta actin.
